# Supplementary material for: Performance Assessment of Software to Detect and Assist Prescribers with Antimicrobial Drug Interactions: Are all of them Created Equal?
Source: Antibiotics (Basel). 2020 Jan 4;9(1):19. doi: 10.3390/antibiotics9010019 (PMC7167986; doi:10.3390/antibiotics9010019)
Supplement: Supplementary file 1 [file antibiotics-09-00019-s001.xlsx]

## Sheet: Sensitivity
DDI Software Platform	Lexicomp Drug Interactions	Drugs.com	Epocrates online	Medscape	iDoctus	Medimecum	Guía IF
Availability to detect the ADI
Trimethoprim/Enalapril	Yes	Yes	Yes	Yes	Yes	No	No
Linezolid/Metoclopramide	Yes	Yes	Yes	No	No	No	No
Levofloxacin/Systemic prednisone	Yes	Yes	Yes	Yes	No	Yes	No
Escitalopram/Ciprofloxacin	Yes	Yes	No	No	Yes	Yes	No
Oral Levofloxacin/antacids	Yes	Yes	Yes	No	Yes	Yes	Yes
Meropenem/valproic acid	Yes	Yes	Yes	Yes	Yes	Yes	No
Quinolones/NSAIDs	Yes	Yes	Yes	Yes	No	Yes	Yes
Cefditoren/omeprazole	Yes	Yes	Yes	No	No	No	No
Rifampicin/Apixaban	Yes	Yes	Yes	Yes	Yes	Yes	Yes
Fluconazole/Diltiazem	Yes	Yes	No	Yes	Yes	Yes	Yes
ADIs Detected	10	10	8	6	6	7	4
Sensitivity	1	1	0.8	0.6	0.6	0.7	0.4
Sensitivity (%) = number of ADIs detected/total ADIs x 100.

## Sheet: Recommended action
DDI Software Platform	Lexicomp Drug Interactions	Drugs.com	Epocrates online	Medscape	iDoctus	Medimecum	Guía IF
Offers recommended action
Trimethoprim/Enalapril	Monitor	Monitor (1)	Monitor/Modify (0.5)	Monitor (1)	Avoid (0.5)	Not detected	Not detected
Linezolid/Metoclopramide	Avoid	Avoid (1)	Avoid (1)	Not detected	Not detected	Not detected	Not detected
Levofloxacin/Systemic prednisone	Monitor	Monitor (1)	Monitor/Modify (0.5)	Monitor (1)	Not detected	Monitor (1)	Not detected
Escitalopram/Ciprofloxacin	Monitor	Monitor (1)	Not detected	Not detected	Avoid (0.5)	Avoid (0.5)	Not detected
Oral Levofloxacin/antacids	Modify	Modify (1)	Monitor/modify (0.5)	Not detected	Modify (1)	Modify (1)	Monitor (0.5)
Meropenem/valproic acid	Modify	Avoid (0.5)	Avoid (0.5)	Avoid (0.5)	Avoid (0.5)	Avoid (0.5)	Not detected
Quinolones/NSAIDs	Monitor	Monitor (1)	Monitor (1)	Modify/Monitor (0.5)	Not detected	Monitor (1)	Monitor (1)
Cefditoren/omeprazole	Modify	Avoid (0.5)	Avoid (0.5)	Not detected	Not detected	Not detected	Not detected
Rifampicin/Apixaban	Avoid	Avoid (1)	Avoid (1)	Avoid (1)	Monitor (0.5)	Monitor (0.5)	Monitor (0.5)
Fluconazole/Diltiazem	Monitor	Monitor (1)	Not detected	Monitor (1)	Monitor (1)	Monitor (1)	Monitor (1)
Score/ADIs detected	10/10	9/10	5.5/8	5/6	4/6	5.5/7	3/4
Adapted Score (maximum 3 points)	3	2.7	2	2.5	2	2.3	2.2
The DDI platform shows the same recommendation than the gold standard: 1 point; other approximate recommendation: 0.5 points; no recommendation: 0 points

## Sheet: Clinical Effect
DDI Software Platform	Lexicomp Drug Interactions	Drugs.com	Epocrates online	Medscape	iDoctus	Medimecum	Guía IF
Describes clinical effect
Trimethoprim/Enalapril	Hyperkalemia/Moderate (0.5/0.5)	Hyperkalemia/Major (0.5/0)	Hyperkaliemia/No (0.5/0)	Hyperkaliemia/No (0.5/0)	Hyperkaliemia/Moderate (0.5/0.5)	Not detected	Not detected
Linezolid/Metoclopramide	Hypertension/Moderate (0.5/0.5)	Hypertension/Moderate (0.5/0.5)	Hypertension/No (0.5/0)	Not detected	Not detected	Not detected	Not detected
Levofloxacin/Systemic prednisone	Tendinopathy/Moderate (0.5/0.5)	Tendinopathy/Major (0.5/0)	Tendinopathy/No (0.5/0)	Tendinopathy/No (0.5/0)	Not detected	Tendinopathy/No (0.5/0)	Not detected
Escitalopram/Ciprofloxacin	QT interval prolongation/Moderate (0.5/0.5)	QT interval prolongation/Major (0.5/0)	Not detected	Not detected	QT interval prolongation/Moderate (0.5/0.5)	QT interval prolongation/No (0.5/0)	Not detected
Oral Levofloxacin/antacids	Decrease absorption of levofloxacin/Moderate (0.5/0.5)	Decrease absorption of levofloxacin/Moderate (0.5/0.5)	Decrease absorption of levofloxacin/No (0.5/0)	Not detected	Decrease absorption of levofloxacin/Moderate (0.5/0.5)	Decrease absorption of levofloxacin/No (0.5/0)	Decrease absorption of levofloxacin/Moderate (0.5/0.5)
Meropenem/valproic acid	Decrease serum concentration of valproic acid/Major (0.5/0.5)	Decrease serum concentration of valproic acid/Major (0.5/0.5)	Decrease serum concentration of valproic acid/No (0.5/0)	Decrease serum concentration of valproic acid/Serious (0.5/0.5)	Decrease serum concentration of valproic acid/Minor (0.5/0)	Decrease serum concentration of valproic acid/No (0.5/0)	Not detected
Quinolones/NSAIDs	Neuroexcitation/Major (0.5/0.5)	Neuroexcitation/Moderate (0.5/0)	Neuroexcitation/No (0.5/0)	Neuroexcitation/No (0.5/0)	Not detected	Neuroexcitation/No (0.5/0)	Neuroexcitation/No (0.5/0)
Cefditoren/omeprazole	Decrease serum concentration of cefditoren/Moderate (0.5/0.5)	Decrease serum concentration of cefditoren/Moderate (0.5/0.5)	Decrease serum concentration of cefditoren/No (0.5/0)	Not detected	Not detected	Not detected	Not detected
Rifampicin/Apixaban	Decrease serum concentration of apixaban/Major (0.5/0.5)	Decrease serum concentration of apixaban/Major (0.5/0.5)	Decrease serum concentration of apixaban/No (0.5/0)	Decrease serum concentration of apixaban/No (0.5/0)	Decrease serum concentration of apixaban/Moderate (0.5/0)	Decrease serum concentration of apixaban/No (0.5/0)	Decrease serum concentration of apixaban/Moderate (0.5/0)
Fluconazole/Diltiazem	Increase serum concentration of diltiazem/Moderate (0.5/0.5)	Increase serum concentration of diltiazem/Moderate (0.5/0.5)	Not detected	Increase serum concentration of diltiazem/No (0.5/0)	Increase serum concentration of diltiazem/Moderate (0.5/0.5)	Increase serum concentration of diltiazem/No (0.5/0)	Increase serum concentration of diltiazem/Moderate (0.5/0.5)
Score/ADIs detected	10/10	8/10	4/8	3.5/6	5/6	3.5/7	3/4
Adapted Score (maximum 2 points)	2	1.6	1	1.1	1.6	1	1.5
The DDI platform shows the same clinical effect (the type of toxicity and severity) than the gold standard: 1 point (0.5 + 0.5); another type of toxicity or severity: 0 points; no clinical effect: 0 points

## Sheet: Mechanism of interaction
DDI Software Platform	Lexicomp Drug Interactions	Drugs.com	Epocrates online	Medscape	iDoctus	Medimecum	Guía IF
Describes mechanism of interaction
Trimethoprim/Enalapril	Boosting of effects on electrolyte renal excretion (1)	Yes (1)	No (0)	No (0)	Yes (1)	Not detected	Not detected
Linezolid/Metoclopramide	Increased net effect of neurotransmision (1)	Yes (1)	Yes (1)	Not detected	Not detected	Not detected	Not detected
Levofloxacin/Systemic prednisone	Enhacement of musculoskeletal adverse effects (1)	Yes (1)	No (0)	No (0)	Not detected	No (0)	Not detected
Escitalopram/Ciprofloxacin	Prolongation of the QT interval (1)	Yes (1)	Not detected	Not detected	Yes (1)	Yes (1)	Not detected
Oral Levofloxacin/antacids	Impaired absortion (1)	Yes (1)	Yes (1)	Not detected	Yes (1)	Yes (1)	Yes (1)
Meropenem/valproic acid	Enhanced metabolism (1)	Yes (1)	Yes (1)	No (0)	Yes (1)	No (0)	Not detected
Quinolones/NSAIDs	Increased net effect of neurotransmision (1)	Yes (1)	No (0)	Yes (1)	Not detected	No (0)	No (0)
Cefditoren/omeprazole	Impaired absortion (1)	Yes (1)	Yes (1)	Not detected	Not detected	Not detected	Not detected
Rifampicin/Apixaban	Induction of CYP3A4 (1)	Yes (1)	Yes (1)	Yes (1)	Yes (1)	Yes (1)	Yes (1)
Fluconazole/Diltiazem	Inhibition of CYP3A4 (1)	Yes (1)	Not detected	Yes (1)	Yes (1)	No (0)	Yes (1)
Score/ADIs detected	10/10	10/10	5/8	3/6	6/6	3/7	3/4
Adapted Score (maximum 0.5 points)	0.5	0.5	0.3	0.2	0.5	0.1	0.3
The DDI platform describes the mechanism of interaction: 1 point, no mechanism of interaction: 0 points.

## Sheet: Quality of evidence
DDI Software Platform	Lexicomp Drug Interactions	Drugs.com	Epocrates online	Medscape	iDoctus	Medimecum	Guía IF
Availability of Quality of evidence
Trimethoprim/Enalapril	Yes (1)	No (0)	No (0)	No (0)	Yes (1)	Not detected	Not detected
Linezolid/Metoclopramide	Yes (1)	No (0)	No (0)	Not detected	Not detected	Not detected	Not detected
Levofloxacin/Systemic prednisone	Yes (1)	No (0)	No (0)	No (0)	Not detected	No (0)	Not detected
Escitalopram/Ciprofloxacin	Yes (1)	No (0)	Not detected	Not detected	Yes (1)	No (0)	Not detected
Oral Levofloxacin/antacids	Yes (1)	No (0)	No (0)	Not detected	Yes (1)	No (0)	Yes (1)
Meropenem/valproic acid	Yes (1)	No (0)	No (0)	No (0)	Yes (1)	No (0)	Not detected
Quinolones/NSAIDs	Yes (1)	No (0)	No (0)	No (0)	Not detected	No (0)	No (0)
Cefditoren/omeprazole	Yes (1)	No (0)	No (0)	Not detected	Not detected	Not detected	Not detected
Rifampicin/Apixaban	Yes (1)	No (0)	No (0)	No (0)	Yes (1)	No (0)	No (0)
Fluconazole/Diltiazem	Yes (1)	No (0)	Not detected	No (0)	Yes (1)	No (0)	No (0)
Score/ADIs detected	10/10	0/10	0/8	0/6	6/6	0/7	1/4
Adapted Score (maximum 0.5 points)	0.5	0	0	0	0.5	0	0.1
Quality of evidence is available: 1 point, no available: 0 points

## Sheet: References
DDI Software Platform	Lexicomp Drug Interactions	Drugs.com	Epocrates online	Medscape	iDoctus	Medimecum	Guía IF
Availability of References
Trimethoprim/Enalapril	Yes (1)	Yes (1)	No (0)	No (0)	Yes (1)	Not detected	Not detected
Linezolid/Metoclopramide	Yes (1)	Yes (1)	No (0)	Not detected	Not detected	Not detected	Not detected
Levofloxacin/Systemic prednisone	Yes (1)	Yes (1)	No (0)	No (0)	Not detected	No (0)	Not detected
Escitalopram/Ciprofloxacin	Yes (1)	Yes (1)	Not detected	Not detected	Yes (1)	No (0)	Not detected
Oral Levofloxacin/antacids	Yes (1)	Yes (1)	No (0)	Not detected	Yes (1)	No (0)	Yes (1)
Meropenem/valproic acid	Yes (1)	Yes (1)	No (0)	No (0)	Yes (1)	No (0)	Not detected
Quinolones/NSAIDs	Yes (1)	Yes (1)	No (0)	No (0)	Not detected	No (0)	Yes (1)
Cefditoren/omeprazole	Yes (1)	Yes (1)	No (0)	Not detected	Not detected	Not detected	Not detected
Rifampicin/Apixaban	Yes (1)	Yes (1)	No (0)	No (0)	Yes (1)	No (0)	Yes (1)
Fluconazole/Diltiazem	Yes (1)	Yes (1)	Not detected	No (0)	Yes (1)	No (0)	Yes (1)
Score/ADIs detected	10/10	10/10	0/8	0/6	6/6	0/7	4/4
Adapted Score (maximum 1 point)	1	1	0	0	1	0	1
References available: 1 point; no references available: 0 points
